# Supplementary material for: Prevalence and risk factors of intestinal parasitism among two indigenous sub-ethnic groups in Peninsular Malaysia
Source: PubMed Central journal article supplement (PMC4950084; doi:10.1186/s40249-016-0168-z), 2016-07-18
Supplement: 40249_2016_168_MOESM2_ESM.pdf [file 40249_2016_168_MOESM2_ESM.pdf]

Table S1: General characteristics of indigenous communities who participated in this study

| Variables                                 | Total (N=186) |                | Temuan (N=106) |                | Mah Meri (N=80) |                |
|-------------------------------------------|---------------|----------------|----------------|----------------|-----------------|----------------|
|                                           | No. examined  | Percentage (%) | No. examined   | Percentage (%) | No. examined    | Percentage (%) |
| <b>DEMOGRAPHIC DATA</b>                   |               |                |                |                |                 |                |
| Age group                                 |               |                |                |                |                 |                |
| <15 years                                 | 63            | 33.9           | 43             | 40.6           | 20              | 25.0           |
| ≥15 years                                 | 123           | 66.1           | 63             | 59.4           | 60              | 75.0           |
| Gender                                    |               |                |                |                |                 |                |
| Male                                      | 79            | 42.5           | 43             | 40.6           | 36              | 45.0           |
| Female                                    | 107           | 57.5           | 63             | 59.4           | 44              | 55.0           |
| <b>SOCIOECONOMIC STATUS</b>               |               |                |                |                |                 |                |
| Education attainment                      |               |                |                |                |                 |                |
| Formal education                          | 152           | 81.7           | 82             | 77.4           | 70              | 87.5           |
| Informal education                        | 34            | 18.3           | 24             | 22.6           | 10              | 12.5           |
| Employment                                |               |                |                |                |                 |                |
| Unemployed                                | 131           | 70.4           | 76             | 71.7           | 55              | 68.8           |
| Size of family                            |               |                |                |                |                 |                |
| ≥5 members                                | 120           | 64.5           | 73             | 68.9           | 47              | 58.8           |
| Household income                          |               |                |                |                |                 |                |
| <RM750*                                   | 132           | 71.0           | 62             | 58.5           | 70              | 87.5           |
| Source of water supply                    |               |                |                |                |                 |                |
| Untreated water source                    | 47            | 25.3           | 30             | 28.3           | 17              | 21.3           |
| Presence of toilet                        |               |                |                |                |                 |                |
| Yes                                       | 151           | 81.2           | 85             | 80.2           | 66              | 82.5           |
| Presence of domestic animals at household |               |                |                |                |                 |                |
| Yes                                       | 113           | 60.8           | 69             | 65.1           | 44              | 55.0           |
| <b>PERSONAL HYGIENE PRACTICES</b>         |               |                |                |                |                 |                |
| Boiling water before drinking             |               |                |                |                |                 |                |
| Yes                                       | 126           | 67.7           | 73             | 68.9           | 53              | 66.3           |
| Wearing shoes outside house               |               |                |                |                |                 |                |
| Yes                                       | 135           | 72.6           | 80             | 75.5           | 58              | 72.5           |

\*1 RM = 0.25 USD

Table S2: Predictive power of the enter and forward selection logistic regression model

| <b>Observed</b>                     |     | <b>Overall indigenous people enter selection model</b> | <b>Overall indigenous people forward selection model</b> | <b>Temuan sub-ethnic group enter selection model</b> | <b>Temuan sub-ethnic group forward selection model</b> | <b>Mah Meri sub-ethnic group enter selection model</b> | <b>Mah Meri sub-ethnic group forward selection model</b> |
|-------------------------------------|-----|--------------------------------------------------------|----------------------------------------------------------|------------------------------------------------------|--------------------------------------------------------|--------------------------------------------------------|----------------------------------------------------------|
| Presence of parasitic infection (%) | Yes | 97.9                                                   | 100.0                                                    | 100.0                                                | 100.0                                                  | 100.0                                                  | 100.0                                                    |
|                                     | No  | 19.5                                                   | 0                                                        | 0                                                    | 0                                                      | 0                                                      | 0                                                        |
| Overall percentage (%)              |     | 80.6                                                   | 78.0                                                     | 76.4                                                 | 76.4                                                   | 80.0                                                   | 80.0                                                     |
